# Supplementary material
Source: PubMed Central journal article supplement (PMC3508330)
Supplement: NIHMS413232-supplement-Supp_FigureS1-S5_TableS1.pdf [file NIHMS413232-supplement-Supp_FigureS1-S5_TableS1.pdf]

# Supporting Information Figs S1-S5 and Table S1

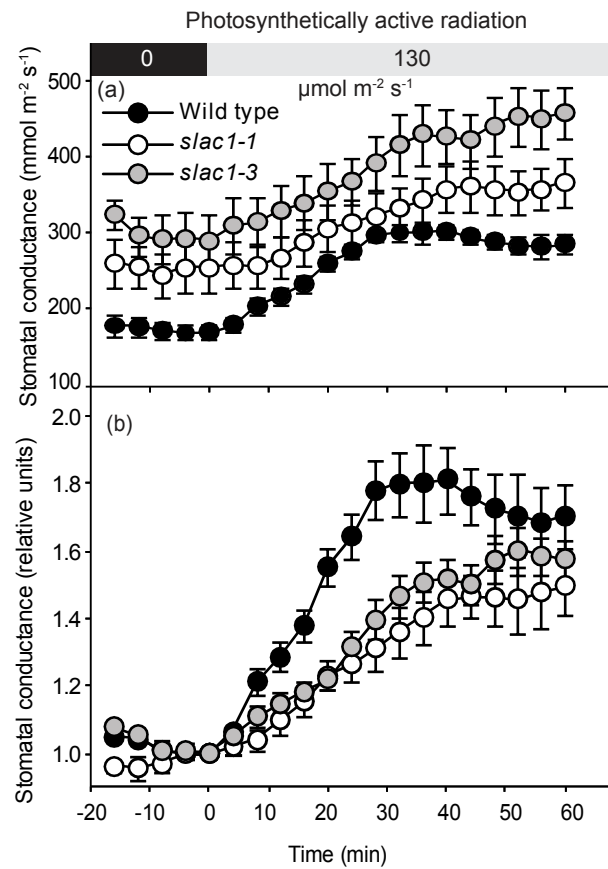

Figure S1

**Figure S1.** Light-induced increase in whole-plant stomatal conductance is reduced in *slac1* mutants. Stomatal conductance patterns of wild type, *slac1-1*, and *slac1-3* plants kept in darkness at normal air humidity (65 %) for two hours and then exposed to 130  $\mu\text{mol m}^{-2} \text{s}^{-1}$  light as indicated in upper panel are shown. Values normalized to stomatal conductance at time 0 (a) as well as absolute values (b) are presented. Error bars indicate  $\pm\text{SEM}$ ,  $n=7-8$ .

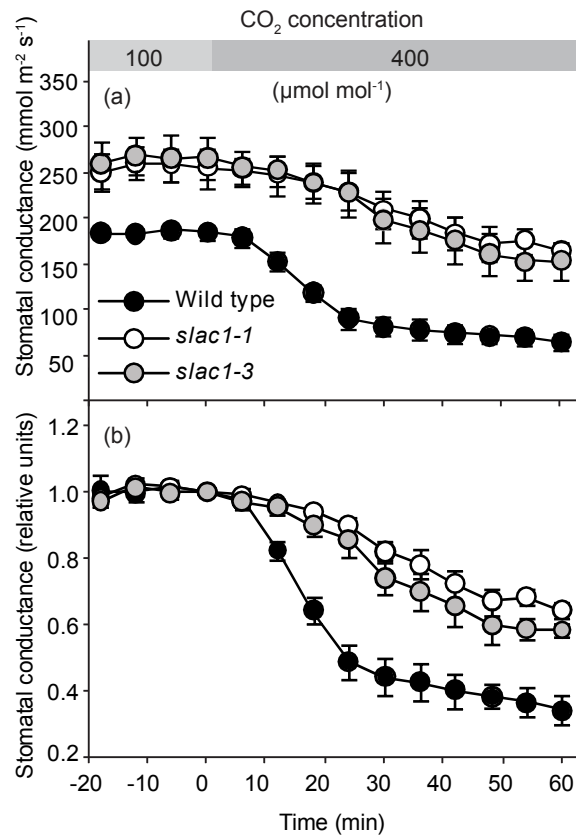

Figure S2

**Figure S2.** CO<sub>2</sub>-induced stomatal closure in *slac1* mutants occurs at below-ambient CO<sub>2</sub> concentrations.

(a, b) Stomatal closure was induced by increasing CO<sub>2</sub> from 100 μmol mol<sup>-1</sup> to 400 μmol mol<sup>-1</sup> for 60 min, at air relative humidity of 56% (±SEM, *n* = 4). Patterns of average stomatal conductance in absolute values (a) and normalized to time 0 (b) are shown.

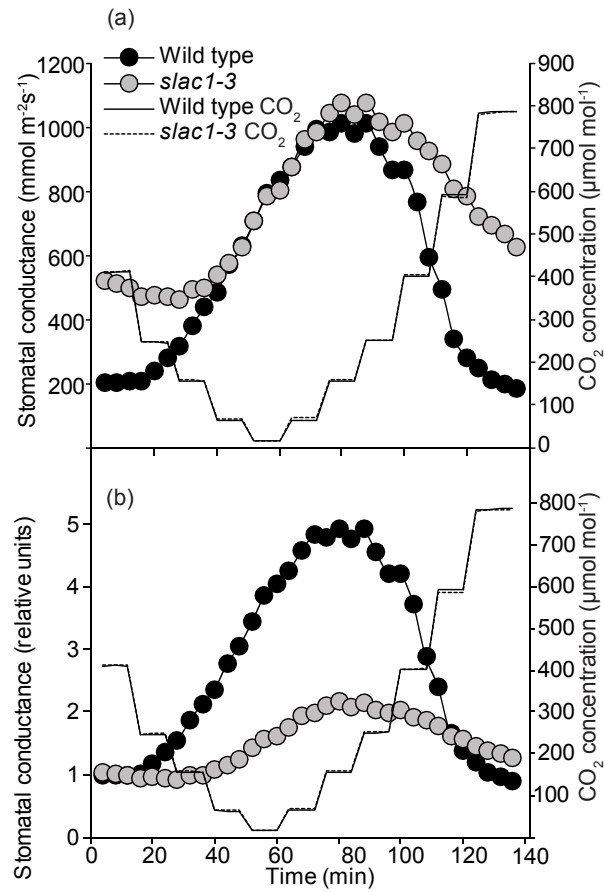

Figure S3

**Figure S3.** CO<sub>2</sub>-induced changes in stomatal conductance of wild type and *slac1-3* plants. After acclimatization of plants at normal air humidity (65 %) and CO<sub>2</sub> concentration of 400 μmol mol<sup>-1</sup>, CO<sub>2</sub> was stepwise decreased to 0 μmol mol<sup>-1</sup> as shown by solid (wild type) and dashed line (*slac1-3*). Patterns of average stomatal conductance in absolute values (a) and normalized to time 0 (b) are shown. Experiment was repeated three times with similar results.

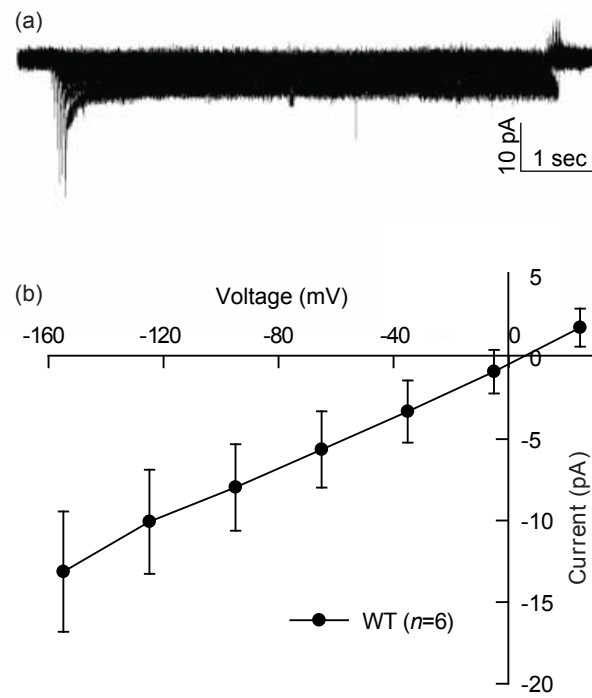

Figure S4

**Figure S4.** Whole-cell patch clamp recordings of wild-type Arabidopsis guard cells showing that S-type anion channels do not mediate large malate efflux currents (-13 pA at -155 mV) activity comparing to chloride efflux currents (-94 pA at -145 mV) (Vahisalu *et al.*, 2008). (a) Whole-cell recordings in response to voltage steps from -145 mV to +35 mV. (b) Average current voltage curve of guard cells recorded as in (a). Pipette solution contained 150 mM Cs-malate and bath solution contained 30 mM Cs-malate. Error bars indicate  $\pm$ SEM,  $n=6$ .

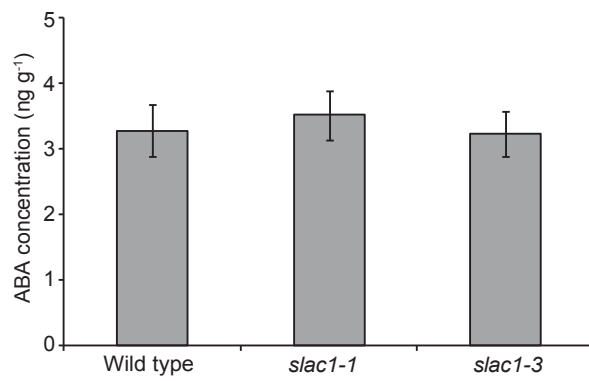

Figure S5

**Figure S5.** Whole-plant abscisic acid (ABA) concentrations of *slac1-1* and *slac1-3*. The concentrations of ABA were determined according to Forcat *et al.* (2008, Plant Methods, 4:16) in 25 d old plants of wild type, *slac1-1* and *slac1-3* plants. Experiment was carried out in three different sets of plants ( $n=5$ ). Error bars indicate  $\pm$ SEM,  $n=3$ .

Supplementary Table 1. Primers used for Real-Time PCR

| Protein                | Primer efficiency | Primers                                                                                 |
|------------------------|-------------------|-----------------------------------------------------------------------------------------|
| at4g34270<br>(control) | 0.86              | Forward 5'-GTGAAAAGTGTGGAGAGAAGCAA-3'<br>Reverse 5'-TCAACTGGATACCCCTTTCGCA-3'           |
| AHA1                   | 0.88              | Forward 5'-CTGGGAGGCTACCAAGCCA-3'<br>Reverse 5'-CTCACACCGAACTTGTCCGA-3'                 |
| AHA2                   | 0.82              | Forward 5'-CCGGAGTCTTCCCAGAGC-3'<br>Reverse 5'-TTTAGAGCAGGGGCATCATT-3'                  |
| AHA5                   | 0.97              | Forward 5'-GGCTGTTGCAAGACAGGAA-3'<br>Reverse 5'-CGGAGGATCAAAAAGAGGTAAA-3'               |
| KAT1                   | 0.93              | Forward 5'-AGCATGGGATGGGAAGAGTGGAG-3'<br>Reverse 5'-AGAGCAGTGTCCGGAAGTCCGAT-3'          |
| KAT2                   | 0.82              | Forward 5'-TAGCTCGCTGTTTGCAAGG-3'<br>Reverse 5'-CAAACAGTGTCAACCGAAATGA-3'               |
| AKT1                   | 0.73              | Forward 5'-ACA TCCTTG TGAACGGAACC-3'<br>Reverse 5'-CCTCTCTCACAATGCTTTCTGTT-3'           |
| AKT2                   | 0.83              | Forward 5'-GCTGCTTTTCGACTTCTATCAGT-3'<br>Reverse 5'-ATCAGTCCATGTCTTTCTTGGT-3'           |
| AtABC14                | 0.85              | Forward 5'-TTCTCGCGTTTACAGAATG-3'<br>Reverse 5'-CTGTTTGCATCCAACAAGCA-3'                 |
| GORK                   | 0.87              | Forward 5'-GCATCAATCCGCGCCAAGATT-3'<br>Reverse 5'-GTGGAGCAGCCTTTGAAGAGA-3'              |
| TPC1                   | 0.84              | Forward 5'-CGCTTGATATCGAAGAAAGCTC-3'<br>Reverse 5'-TCTCCAACACATATATCCAACCA-3'           |
| AtALMT12               | 0.93              | Forward 5'-TCGCTCTATAGAAGCATGTGTGGATGA-3'<br>Reverse 5'-AATCCAAAACAGCTTGATACCCCTTCGT-3' |
| AtKC1                  | 0.83              | Forward 5'-CTCAAGACATGAAAATGGACAGAT-3'<br>Reverse 5'-GAATCACCATTGTTTTTGTATCTTG-3'       |
